# Supplementary material
Source: PubMed Central journal article supplement (PMC4443312)
Supplement: pnas.201424774SI.pdf [file pnas.201424774SI.pdf]

# Supporting Information

Hashimoto-Kataoka et al. 10.1073/pnas.1424774112

## SI Materials and Methods

**Isolation and Preparation of Murine Alveolar Macrophages.** BALF was obtained through the intratracheal instillation of three 0.9-mL aliquots of PBS, which were collected and filtered through a 40- $\mu$ m cell strainer to exclude contaminating epithelial cells, which appeared in clumps. The percentage of the macrophage lineage (CD45<sup>+</sup>CD11c<sup>+</sup>F4/80<sup>+</sup>) cells in the living cells isolated from BALF was 83.7  $\pm$  0.7% by flow cytometry analysis as shown in Fig. S2. For cell-culture experiments, primary mouse alveolar macrophages were obtained by bronchoalveolar lavage (BAL) and were cultured in DMEM containing 2% FBS. The cells were seeded at 1.5  $\times$  10<sup>5</sup> cells per well in 24-well plates containing supplemented DMEM (10% FBS, 2 mM L-glutamine, 100 IU/mL penicillin, and 100  $\mu$ g/mL streptomycin) and were incubated at 37  $^{\circ}$ C for 4 h; then the medium was replaced with serum-free DMEM. The cells were serum-starved overnight and then were stimulated with mouse recombinant IL-21 (20 ng/mL), IL-6 (100 ng/mL), and/or sIL-6R (100 ng/mL) (R&D Systems) for 18 h.

**PASMC Proliferation Assay.** HPASMCs were purchased from Lonza and used within the first six passages. HPASMCs were cultured in 96-well tissue-culture plates (2  $\times$  10<sup>3</sup> cells per well) in 100  $\mu$ L of smooth muscle cell basal medium (SmBM; Lonza) with 5% FBS and SingleQuot supplement (Lonza). Two days before the assay, the medium was replaced with SmBM supplemented with 0.1% FBS, 10 mM L-glutamine, 100 IU/mL penicillin, and 100  $\mu$ g/mL

streptomycin. For the macrophage-conditioned medium experiment, normoxic primary mouse alveolar macrophages were obtained by BAL, pooled, washed by centrifugation, counted, and added to 96-well tissue culture plates at 2  $\times$  10<sup>5</sup> cells per well in supplemented DMEM (10% FBS, 2 mM L-glutamine, 100 IU/mL penicillin, and 100  $\mu$ g/mL streptomycin). The macrophages were incubated at 37  $^{\circ}$ C for 4 h, followed by medium replacement with serum-free DMEM. The macrophages were serum-starved overnight, stimulated with mouse recombinant IL-21 (20 ng/mL) for 18 h, washed with PBS, and cultured again in DMEM alone. After 24 h the culture medium was collected, diluted twofold with fresh DMEM supplemented with 0.2% FBS, and used as conditioned medium. The conditioned medium was applied to HPASMCs, and the cultures were incubated for an additional 3 d. When indicated, the HPASMCs were treated with the conditioned medium supplemented with a CXCR4 chemical inhibitor, AMD3100 (1  $\mu$ g/ $\mu$ L) (Sigma), or vehicle (PBS). The HPASMCs were stimulated with human recombinant IL-21 (10–100 ng/mL) (Life Technologies), IL-6 (100 ng/mL), and/or sIL-6R (100 ng/mL) (R&D Systems) for 24 h. HPASMCs treated with 5% FBS served as a positive control. Cell proliferation was assessed using the cell proliferation reagent from the Cell Titer 96 kit (Promega). The Cell Titer 96 reagent (20  $\mu$ L) was added to each well (containing 100  $\mu$ L of medium), followed by a 2-h incubation at 37  $^{\circ}$ C, and then the absorbance at 490 nm was determined.

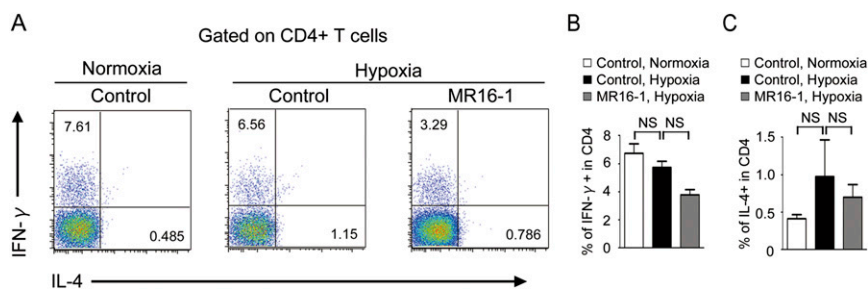

**Fig. S1.** IL-6 blockade does not significantly affect Th1 and Th2 cell accumulation in mouse lungs after hypoxia exposure. (A) Flow cytometry analysis of IFN- $\gamma$ -expressing cells and IL-4-expressing cells in the CD4<sup>+</sup>-gated T-cell population isolated from the lungs of mice treated with control antibody or MR16-1 after exposure to hypoxia or normoxia for 3 d. Representative results from three independent experiments are shown ( $n = 3$  per group). (B and C) Percentage of IFN- $\gamma$ -expressing (B) and IL-4-expressing (C) cells in the CD4<sup>+</sup> population. Values shown are the mean  $\pm$  SEM for three independent experiments. NS, not significant.

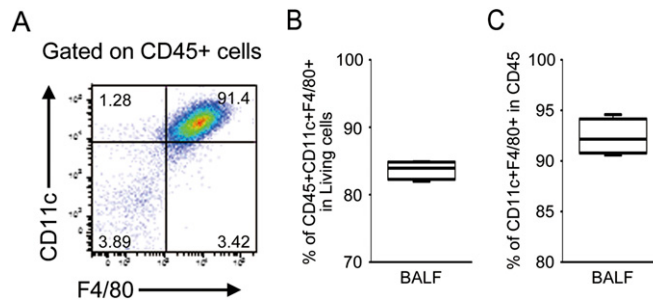

**Fig. S2.** Cells isolated from BALF are mainly alveolar macrophages. (A) Flow cytometry analysis of F4/80<sup>+</sup> and CD11c<sup>+</sup> cells in the CD45<sup>+</sup>-gated cell population isolated by BALF in mice ( $n = 4$ ). (B) The percentage of alveolar macrophages in living cells isolated by BALF. (C) The percentage of F4/80<sup>+</sup> and CD11c<sup>+</sup> alveolar macrophages within the CD45<sup>+</sup> population. Values shown are the mean  $\pm$  SEM from two independent experiments.

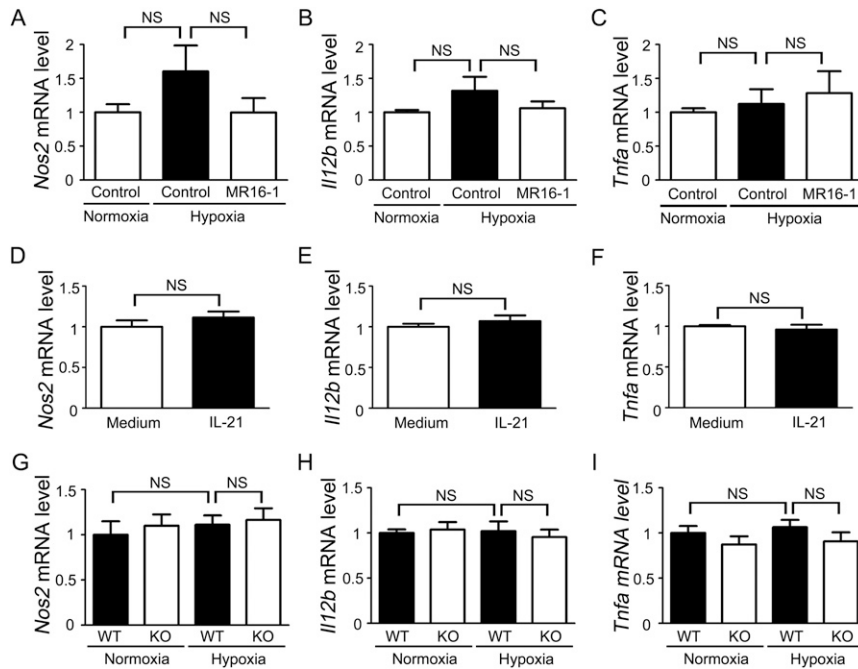

**Fig. S3.** Neither IL-6 nor IL-21 is involved in the gene expression of M1 macrophage markers. (A–C) IL-6 blockade does not affect M1 macrophage activation in mouse lungs. qRT-PCR analysis of M1 macrophage marker genes including *Nos2* (A), *Il-12 $\beta$*  (B), and *Tnf- $\alpha$*  (C) in the alveolar macrophages isolated from mice treated with control antibody or MR16-1 after exposure to hypoxia or normoxia for 4 d ( $n = 6$  in each group). Values shown are the mean  $\pm$  SEM from three independent experiments. (D–F) IL-21 does not affect the expression of M1-related macrophage marker genes in primary alveolar macrophages. qRT-PCR analysis of M1 macrophage marker genes including *Nos2* (D), *Il-12 $\beta$*  (E), and *Tnf- $\alpha$*  (F) in primary alveolar macrophages treated with IL-21 (20 ng/mL). The results shown are the pooled data from three independent experiments with six total wells per group. Values shown are the mean  $\pm$  SEM. (G–I) IL-21 blockade does not affect M1 macrophage polarization in mouse lungs. qRT-PCR analysis of M1 macrophage marker genes including *Nos2* (G), *Il-12 $\beta$*  (H), and *Tnf- $\alpha$*  (I) in the alveolar macrophages isolated from WT or IL-21RKO (KO) mice after exposure to hypoxia or normoxia for 4 d ( $n = 6$  in each group). Values shown are the mean  $\pm$  SEM from three independent experiments. NS, not significant.



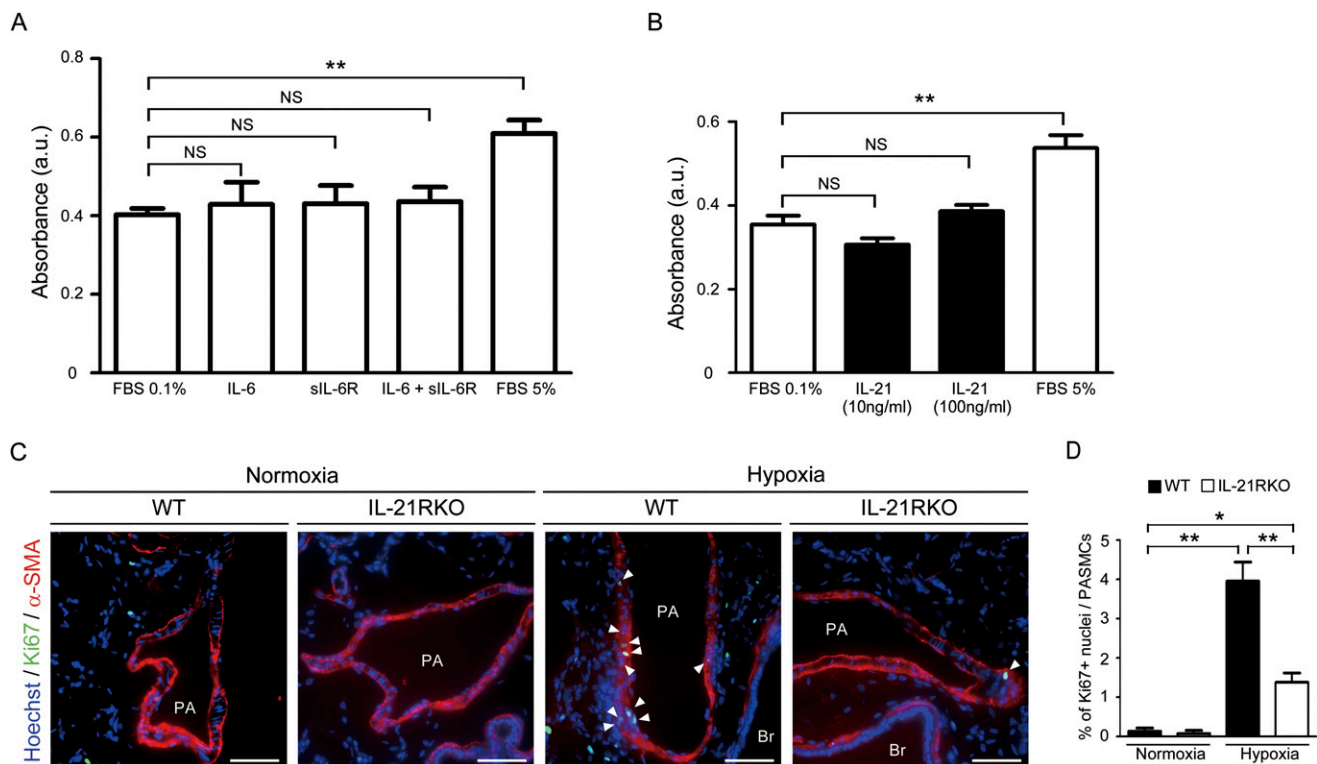

**Fig. 55.** Hypoxia-induced proliferation of PSMCs is mediated indirectly through IL-21-dependent signaling. (A and B) Treatment with IL-6, sIL-6R, or both, or with IL-21 does not promote the proliferation of HPASMCs. Cell proliferation analysis of HPASMCs treated with IL-6, sIL-6R, or both (each at 100 ng/mL) (A) or with IL-21 (10 or 100 ng/mL) (B) in the presence of 0.1% FBS. Stimulation of HPASMC proliferation by 5% FBS was used as a positive control. The results shown are pooled data from three independent experiments with 15 wells per group. Values shown are the mean  $\pm$  SEM;  $**P < 0.01$  compared with control medium containing 0.1% FBS. (C and D) IL-21R deletion inhibits the hypoxia-induced proliferation of PSMCs. (C) Ki67 (green) and  $\alpha$ -SMA (red) immunostaining of lung sections from WT and IL-21RKO mice after exposure to hypoxia for 1 wk ( $n = 5$ ). Arrowheads indicate Ki67<sup>+</sup> nuclei. Br, bronchus; PA, pulmonary artery. (Scale bars: 40  $\mu$ m.) (D) Percentage of Ki67<sup>+</sup> nuclei in the PSMCs. Values shown are the mean  $\pm$  SEM;  $*P < 0.05$ ,  $**P < 0.01$  calculated using ANOVA. NS, not significant.

**Table S1. Physiological profiles of the four experimental groups exposed to normoxic and hypoxic conditions and treated with control antibody or MR16-1**

|                      | Normoxia        |                 | 4-wk hypoxia      |                              |
|----------------------|-----------------|-----------------|-------------------|------------------------------|
|                      | Control         | MR16-1          | Control           | MR16-1                       |
| Final body weight, g | 25.5 $\pm$ 0.8  | 25.4 $\pm$ 1.7  | 22.4 $\pm$ 1.2**  | 22.1 $\pm$ 1.0**             |
| RV/BW, mg/g          | 0.74 $\pm$ 0.09 | 0.79 $\pm$ 0.08 | 0.96 $\pm$ 0.09** | 0.84 $\pm$ 0.09 <sup>#</sup> |
| LV/BW, mg/g          | 3.02 $\pm$ 0.30 | 3.22 $\pm$ 0.30 | 2.85 $\pm$ 0.20   | 3.11 $\pm$ 0.44              |
| Systolic BP, mm Hg   | 98.9 $\pm$ 7.9  | 100.7 $\pm$ 6.8 | 101.2 $\pm$ 10.5  | 103.0 $\pm$ 7.9              |
| HR, bpm              | 588 $\pm$ 12    | 591 $\pm$ 9     | 575 $\pm$ 7       | 572 $\pm$ 8                  |

Values shown are the mean  $\pm$  SEM ( $n = 8$ –12 for each group). BP, blood pressure; BW, body weight; HR, heart rate; LV, left ventricle; RV, right ventricle.

\*\* $P < 0.01$  compared with mice treated with control antibody under normoxia for 4 wk.

<sup>#</sup> $P < 0.05$  compared with mice treated with control antibody under hypoxia for 4 wk.

**Table S2. Physiological profiles of the four experimental groups comprised of WT and IL-21RKO mice exposed to normoxic or hypoxic conditions**

|                      | Normoxia    |             | 4-wk hypoxia  |              |
|----------------------|-------------|-------------|---------------|--------------|
|                      | WT          | IL-21RKO    | WT            | IL-21RKO     |
| Final body weight, g | 24.5 ± 0.7  | 23.5 ± 0.8  | 21.2 ± 0.6*   | 21.5 ± 0.7*  |
| RV/BW, mg/g          | 0.81 ± 0.04 | 0.82 ± 0.06 | 1.13 ± 0.05** | 0.93 ± 0.03# |
| LV/BW, mg/g          | 3.43 ± 0.10 | 3.38 ± 0.15 | 3.20 ± 0.11   | 3.27 ± 0.13  |
| systolic BP, mm Hg   | 101.5 ± 2.1 | 101.8 ± 0.9 | 100.6 ± 1.3   | 102.8 ± 0.9  |
| HR, bpm              | 571 ± 17    | 606 ± 16    | 601 ± 11      | 590 ± 6      |

Values shown are the mean ± SEM ( $n = 5-10$  for each group). BP, blood pressure; BW, body weight; HR, heart rate; LV, left ventricle; RV, right ventricle.

\* $P < 0.05$  compared with WT mice under normoxia for 4 wk.

\*\* $P < 0.01$  compared with WT mice under normoxia for 4 wk.

# $P < 0.05$  compared with WT mice under hypoxia for 4 wk.

**Table S3. Patient characteristics in the immunohistochemical study**

| Patient | Age, y | Sex | Condition | WHO class | Heath-Edwards grade |
|---------|--------|-----|-----------|-----------|---------------------|
| 1       | 48     | F   | IPAH      | 3         | 3                   |
| 2       | 44     | F   | IPAH      | 3         | 4                   |
| 3       | 13     | M   | IPAH      | 3         | 3                   |
| 4       | 35     | M   | IPAH      | 3         | 4                   |
| 5       | 46     | F   | Control   | NA        | NA                  |

Characteristics of the four IPAH patients and one control patient who provided lung tissue for immunohistochemical analyses with anti-IL-21, anti-Arg-1, and anti-MRC1 antibodies. F, female; M, male; NA, not applicable; WHO, World Health Organization.
